# Supplementary material
Source: PubMed Central journal article supplement (PMC8691162)
Supplement: prs-149-169e-s002.pdf [file prs-149-169e-s002.pdf]

**Supplemental Table 1:** Hospital-wide considerations for resuming surgical care

| <b>Considerations</b>                   | <b>Description</b>                                                                                                                                                                                                                      |
|-----------------------------------------|-----------------------------------------------------------------------------------------------------------------------------------------------------------------------------------------------------------------------------------------|
| Pre-facility precautions                | <ul style="list-style-type: none"><li>• Limited entry points</li><li>• Temperature checks at entry points</li><li>• Mandatory mask requirement</li></ul>                                                                                |
| Inventory of available COVID-19 testing | <ul style="list-style-type: none"><li>• Serology tests for SARS-CoV-2 antibodies (IGM/IgG)</li><li>• Real time PCR testing</li></ul>                                                                                                    |
| Resource requirement                    | Personnel, equipment, space for:<br><ol style="list-style-type: none"><li>a. Surgery patients</li><li>b. Non-surgery patients</li></ol>                                                                                                 |
| Location of cases                       | <ul style="list-style-type: none"><li>• Hospital vs. ambulatory surgery centers depending on acuity of surgical case</li><li>• Persons under investigation or positive COVID-19 patient procedures in negative pressure rooms</li></ul> |
| Environmental control                   | Air circulation, disposable masks, hand sanitizer dispensers, disinfection in between patients using sanitizing wipes and/or ultraviolet light, limitation of visitors, utilization of telemedicine                                     |
| Staff protection                        | Surgical masks, N95 masks, personal protective equipment (gowns, gloves), face shields/goggles                                                                                                                                          |

Experienced anesthesia team for Intubation/  
Extubation

- a. Intubation: Rapid sequence induction, minimal non-invasive positive pressure ventilation (NIPPV; if needed, patient mouths should be covered with a wet barrier), video laryngoscope for intubation, muscle relaxants, end-tidal CO<sub>2</sub> (4)
- b. Extubation: Prophylactic suctioning tube placed prior to extubation, barrier plastic sheet, mitigation of coughing, avoidance of NIPPV, extubation to anesthesia mask with 'double filter' circuit (5)
