# Supplementary material
Source: PubMed Central journal article supplement (PMC8691162)

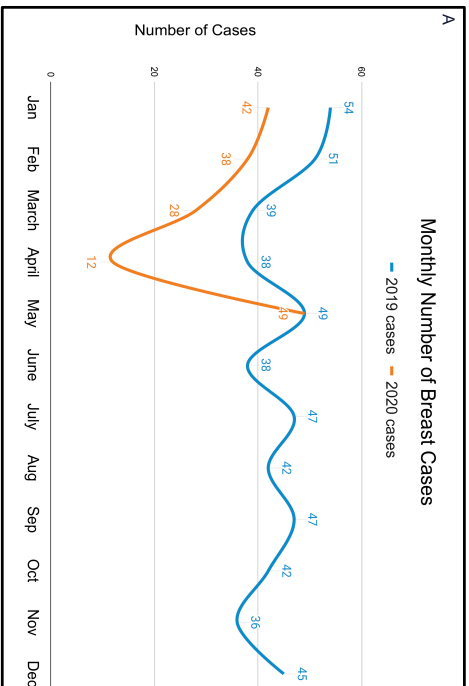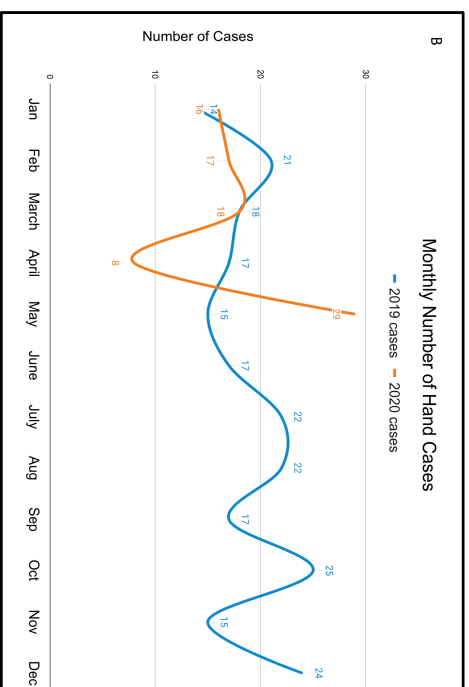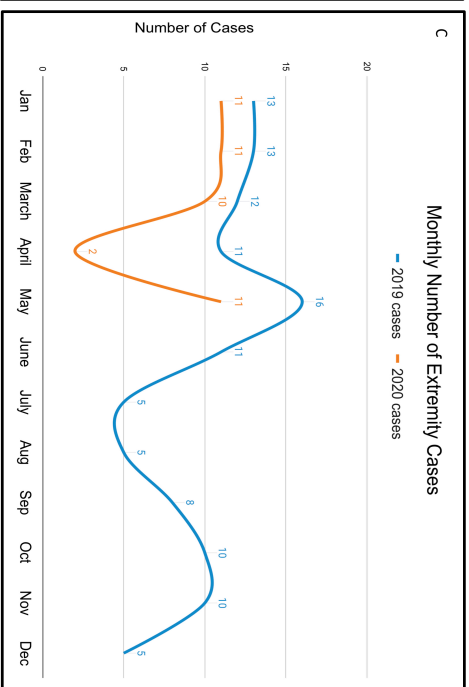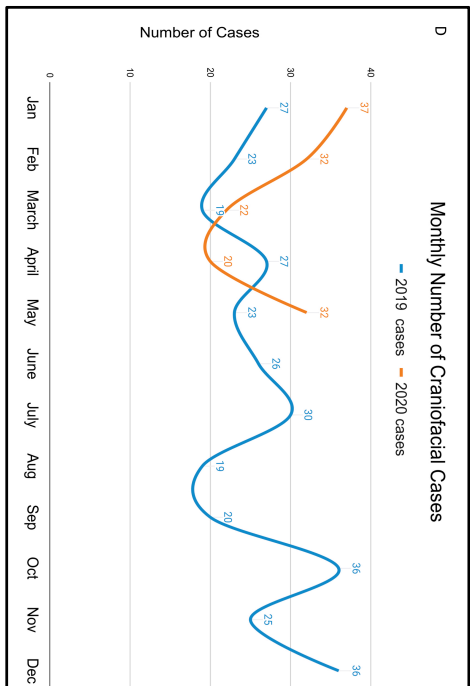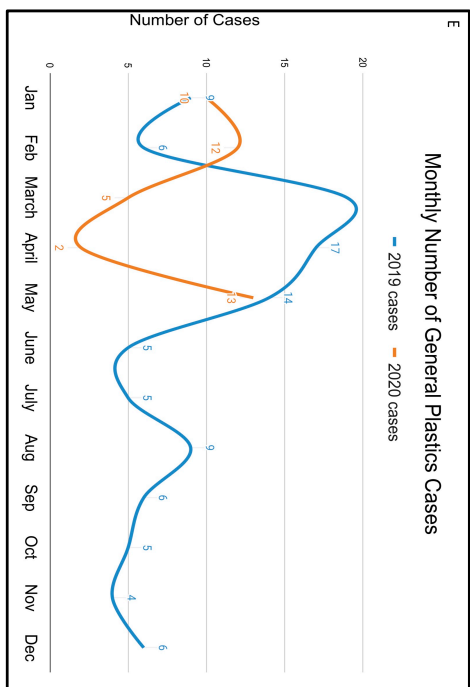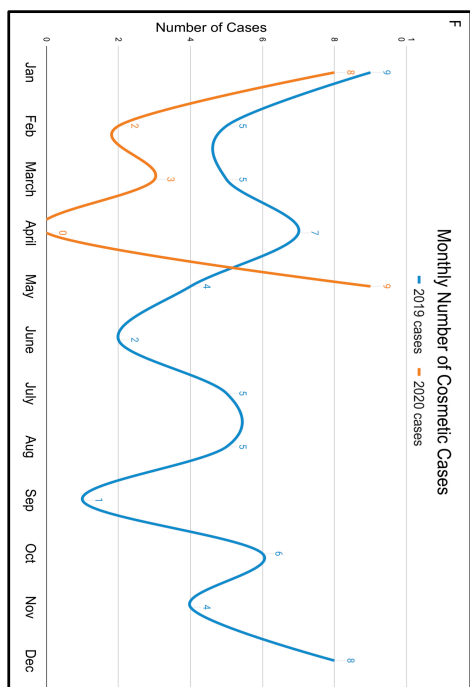

Supplement: prs-149-169e-s001.pdf [file prs-149-169e-s001.pdf]
